# Supplementary material for: MicroRNA-146b Overexpression Promotes Human Bladder Cancer Invasion via Enhancing ETS2-Mediated mmp2 mRNA Transcription
Source: PubMed Central journal article supplement — Mol Ther Nucleic Acids. 2019 Apr 14;16:531–42. doi: 10.1016/j.omtn.2019.04.007 (PMC6506625; doi:10.1016/j.omtn.2019.04.007), 2019-04-14
Supplement: mmc1.pdf [file mmc1.pdf]

OMTN, Volume 16

## Supplemental Information

### **MicroRNA-146b Overexpression Promotes Human Bladder Cancer Invasion via Enhancing ETS2-Mediated *mmp2* mRNA Transcription**

**Junlan Zhu, Chunxia Xu, Liming Ruan, Jianping Wu, Yang Li, and Xingguo Zhang**

Supplementary Table 1: Correlation between miR-146b expression level and clinicopathologic characteristics of BC

| parameters         | Number of cases | miR-146b expression level |      | <i>p</i> value   |
|--------------------|-----------------|---------------------------|------|------------------|
|                    |                 | Low                       | High |                  |
| Gender             |                 |                           |      |                  |
| Male               | 19              | 4                         | 15   | <i>p</i> >0.05   |
| Female             | 11              | 2                         | 9    |                  |
| Age(y)             |                 |                           |      |                  |
| <55                | 9               | 3                         | 6    | <i>p</i> >0.05   |
| >55                | 21              | 3                         | 18   |                  |
| TNM stage          |                 |                           |      |                  |
| I, II              | 15              | 4                         | 11   | * <i>p</i> <0.05 |
| III, IV            | 15              | 2                         | 13   |                  |
| Lymphatic invasion |                 |                           |      |                  |
| Negative           | 16              | 5                         | 11   | * <i>p</i> <0.05 |
| Positive           | 14              | 1                         | 13   |                  |
| Distant metastasis |                 |                           |      |                  |
| Negative           | 20              | 5                         | 15   | * <i>p</i> <0.05 |
| Positive           | 10              | 1                         | 9    |                  |

\**p* < 0.05 was considered significant.
