# Supplementary material for: MicroRNA-146b Overexpression Promotes Human Bladder Cancer Invasion via Enhancing ETS2-Mediated mmp2 mRNA Transcription
Source: PubMed Central journal article supplement — Mol Ther Nucleic Acids. 2019 Apr 14;16:531–42. doi: 10.1016/j.omtn.2019.04.007 (PMC6506625; doi:10.1016/j.omtn.2019.04.007), 2019-04-14
Supplement: mmc2.pdf [file mmc2.pdf]

# MicroRNA-146b Overexpression Promotes Human Bladder Cancer Invasion via Enhancing ETS2-Mediated *mmp2* mRNA Transcription

Junlan Zhu,<sup>1</sup> Chunxia Xu,<sup>1</sup> Liming Ruan,<sup>3</sup> Jianping Wu,<sup>3</sup> Yang Li,<sup>2</sup> and Xingguo Zhang<sup>1</sup>

<sup>1</sup>The Precision Medicine Laboratory, Beilun People's Hospital, Ningbo, Zhejiang, China; <sup>2</sup>Department of Experimental Medical Science, HwaMei Hospital, University of Chinese Academy of Sciences, Key Laboratory of Diagnosis and Treatment of Digestive System Tumors of Zhejiang Province, Ningbo, Zhejiang, China; <sup>3</sup>Department of Laboratory Medicine, The First Affiliated Hospital, College of Medicine, Zhejiang University, Hangzhou, China

Although microRNAs have been validated to play prominent roles in the occurrence and development of human bladder cancer (BC), alterations and function of many microRNAs (miRNAs) in bladder cancer invasion are not fully explored yet. miR-146b was reported to be a tumor suppressor or onco-miRNA in various types of cancer. However, its accurate expression, function, and mechanism in bladder cancer remain unclear. Here we discovered that miR-146b was frequently up-regulated in bladder cancer tissues compared with adjacent non-cancerous tissues. Inhibition of miR-146b resulted in a significant inhibitory effect on the invasion of bladder cancer cells by reducing *mmp2* mRNA transcription and protein expression. We further demonstrated that knockdown of miR-146b attenuated ETS2 expression, which was the transcription factor of matrix metalloproteinase (MMP)2. Moreover, mechanistic studies revealed that miR-146b inhibition stabilized ARE/poly(U)-binding/degradation factor 1 (*auf1*) mRNA by directly binding to its mRNA 3' UTR, further reduced *ets2* mRNA stability, and finally inhibited *mmp2* transcription and attenuated bladder cancer invasion abilities. The identification of the miR-146b/AUF1/ETS2/MMP2 mechanism for promoting bladder cancer invasion provides significant insights into understanding the nature of bladder cancer metastasis. Targeting the pathway described here may be a novel approach for inhibiting invasion and metastasis of bladder cancer.

## INTRODUCTION

Bladder cancer is one of the most common urinary malignancies worldwide, characterized by a high rate of recurrence and no targeted therapy method.<sup>1</sup> In China, approximately 80,500 cases of bladder cancer are diagnosed with roughly 32,900 cancer-related deaths in 2015.<sup>2</sup> Approximately 70% of cases are diagnosed as non-muscle-invasive bladder cancer (NMIBC), whereas the remaining 30% of cases are classified as muscle-invasive bladder cancer (MIBC). The standard treatment for MIBC is radical cystectomy, which provides only a 5-year survival rate of 50%.<sup>3</sup> Thus, a better understanding of the targets is urgently needed to explore the molecular mechanisms involved in the invasion ability of MIBC.

MicroRNAs (miRNAs) are short non-coding RNA molecules that usually repress gene expression by binding to the 3' UTR of their target mRNAs.<sup>4</sup> Increasing evidence indicates that miRNAs play important roles in the formation of bladder cancer.<sup>5,6</sup> The expression of miR-146b has been found in almost all human organs, and the dysregulation of miR-146b has been reported in a variety of human malignancies.<sup>7</sup> A recent study reported that overexpression of miR-146b in breast cancer cells downregulated epidermal growth factor receptor expression, inhibited invasion and migration *in vitro*, and suppressed experimental lung metastasis *in vivo*,<sup>8</sup> suggesting that miR-146b serves as a tumor suppressor. However, some studies reported that miR-146b might act as an oncogene to promote proliferation, migration, and invasion of colorectal and prostate cancers.<sup>9,10</sup> Despite the fact that surging studies of the biogenesis and mechanisms of miR-146b were involved in the pathogenesis of multiple tumors, the accurate expression level and mechanistic function of miR-146b in bladder cancer remain unclear.

AU-rich element (ARE)/poly(U)-binding/degradation factor 1 (AUF1), also known as heterogeneous nuclear ribonucleoprotein D, is a family of four isoforms (37, 40, 42, and 45 kDa), which result from alternative splicing of a single pre-mRNA.<sup>11</sup> AUF1 forms direct complexes with a variety of AU-rich conserved elements in the 3' UTR of many transcripts.<sup>11,12</sup> AUF1 is predominantly

Received 22 November 2018; accepted 7 April 2019;  
<https://doi.org/10.1016/j.omtn.2019.04.007>

**Correspondence:** Xingguo Zhang, PhD, The Precision Medicine Laboratory, Beilun People's Hospital, No. 1288 of Lushan Road, Beilun District, Ningbo 315800, Zhejiang, China.

**E-mail:** [xgzhang666@163.com](mailto:xgzhang666@163.com)

**Correspondence:** Yang Li, Department of Experimental Medical Science, HwaMei Hospital, University of Chinese Academy of Sciences, Key Laboratory of Diagnosis and Treatment of Digestive System Tumors of Zhejiang Province, 41 Xibi Road, Ningbo 315010, Zhejiang, China.

**E-mail:** [li\\_yangvip@126.com](mailto:li_yangvip@126.com)

**Correspondence:** Junlan Zhu, PhD, The Precision Medicine Laboratory, Beilun People's Hospital, No. 1288 of Lushan Road, Beilun District, Ningbo 315800, Zhejiang, China.

**E-mail:** [junlanzhu@163.com](mailto:junlanzhu@163.com)

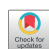

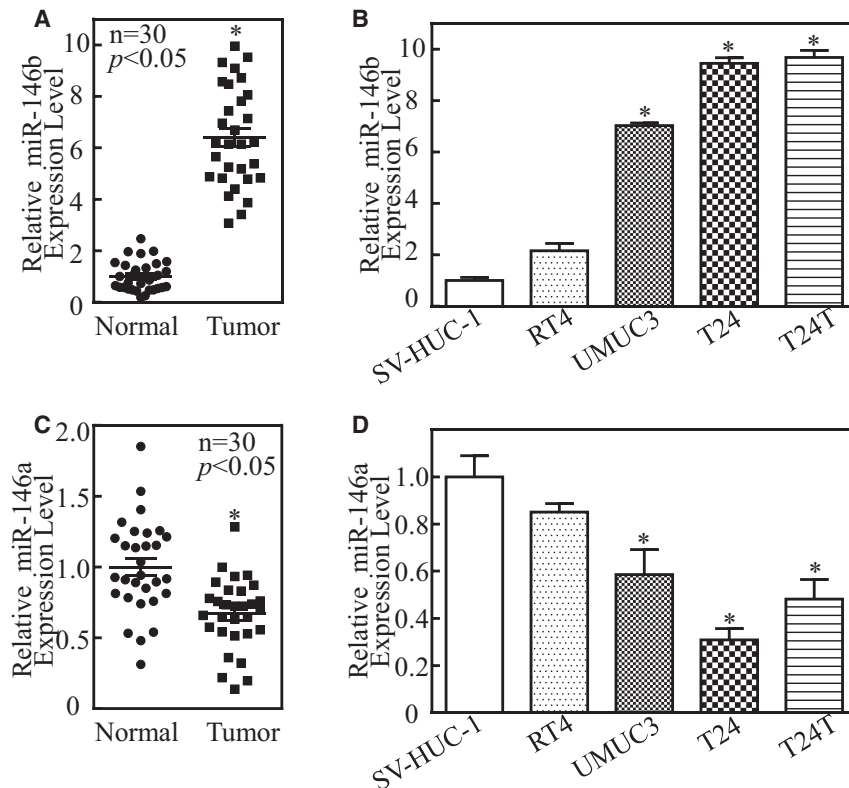

**Figure 1. miR-146b Was Overexpressed in Human Bladder Cancer Tissues and Cell Lines**

(A and C) Total RNA was extracted from human bladder cancer tissues (tumor) and the paired adjacent normal tissues (normal) of 30 patients and then subjected to real-time PCR analyses to determine miR-146b (A) and miR-146a (C) expression levels. Data represent mean  $\pm$  SD (\* $p < 0.05$ ). (B and D) miR-146b (B) and miR-146a (D) levels in human bladder cancer cell lines (RT4, UMUC3, T24, and T24T) were determined and compared with two normal urothelial cell lines (SV-HUC-1) by real-time PCR. miR-146b and miR-146a expression were normalized to U6 expression; error bars represent the mean  $\pm$  SD, and the asterisk (\*) indicates a significant change relative to the control group ( $p < 0.05$ ).

sion of miR-146b was significantly upregulated in the bladder cancer tumor tissues as compared with the paired adjacent non-tumor bladder tissues (Figure 1A). The levels of miR-146b were also assessed in human bladder cancer cell lines (RT4, UMUC3, T24, and T24T) and normal urothelial cell lines (SV-HUC-1). As shown in Figure 1B, a similar expression trend of miR-146b was observed in bladder cancer cell lines in comparison to normal urothelial cell lines. miR-146b is a member of the miR-146 family and shares its

seed and targets with miR-146a; we next detected the expression level of miR-146a in the bladder cancer tissues and cells. The results showed that the expression of miR-146a was downregulated in the bladder cancer tumor tissues and bladder cancer cells (Figures 1C and 1D). Taken together, the above results indicate that miR-146b upregulation has the potential to serve as a new prognostic biomarker for clinical bladder cancer patients.

#### miR-146b Overexpression Was Essential for Human Bladder Cancer Invasion and Anchorage-Independent Growth

To identify the biological function of miR-146b in human bladder cancer, miR-146b inhibitor was transfected into T24T and UMUC3 cells. As shown in Figure 2A, the stable transfectants T24T (miR-146b inhibitor) and UMUC3 (miR-146b inhibitor) and their corresponding nonsense control transfectants were established and identified by real-time PCR. The inhibition of miR-146b showed no impact on the expression of miR-146a in T24T and UMUC3 cells (Figure 2B), excluding the cross-reactivity of miR-146a with miR-146b. The results from invasion assays indicated that the inhibition of miR-146b led to a dramatic decrease of bladder cancer cell invasion ability (Figures 2C–2E). Moreover, inhibition of miR-146b dramatically impaired the monolayer growth of T24T and UMUC3 cells, and it inhibited bladder cancer cell anchorage-independent growth (Figures 2F–2H). Taken together, these results demonstrate a novel positive regulatory effect of miR-146b on human bladder cancer cell invasion and anchorage-independent growth.

associated with mRNA-destabilizing activity.<sup>13</sup> Furthermore, several lines of evidence support a role of AUF1 in the initiation and progression of cancer.<sup>14</sup> Indeed, high AUF1 levels were detected in numerous malignancies, including cancers of the breast, skin, thyroid, and liver.<sup>14,15</sup> However, many potential roles of deregulated AUF1 expression or activity in tumor initiation and progression remain unresolved. In addition, little is known about the mechanisms that control AUF1 expression in many cellular contexts, including those that decrease AUF1 levels during carcinogenesis.

In our research, we demonstrated that miR-146b might be a potential clinical biomarker in bladder cancer. The roles of miR146b on bladder cancer invasion may be through regulation of the AUF1/ETS2/matrix metalloproteinase (MMP)2-signaling pathway. These results might give us great insights into the molecular mechanism of miR-146b-regulated invasion, and miR-146b may be a potential candidate for application in the treatment of bladder cancer.

## RESULTS

### miR-146b Is Highly Expressed in Bladder Cancer Cell Lines and Tissues

To understand the clinical interrelation of the expression level of miR-146b in the bladder cancer tissues, we analyzed 30 pairs of bladder cancer tissue samples and non-tumor tissues from patients by the method of real-time PCR. The results showed that the expres-

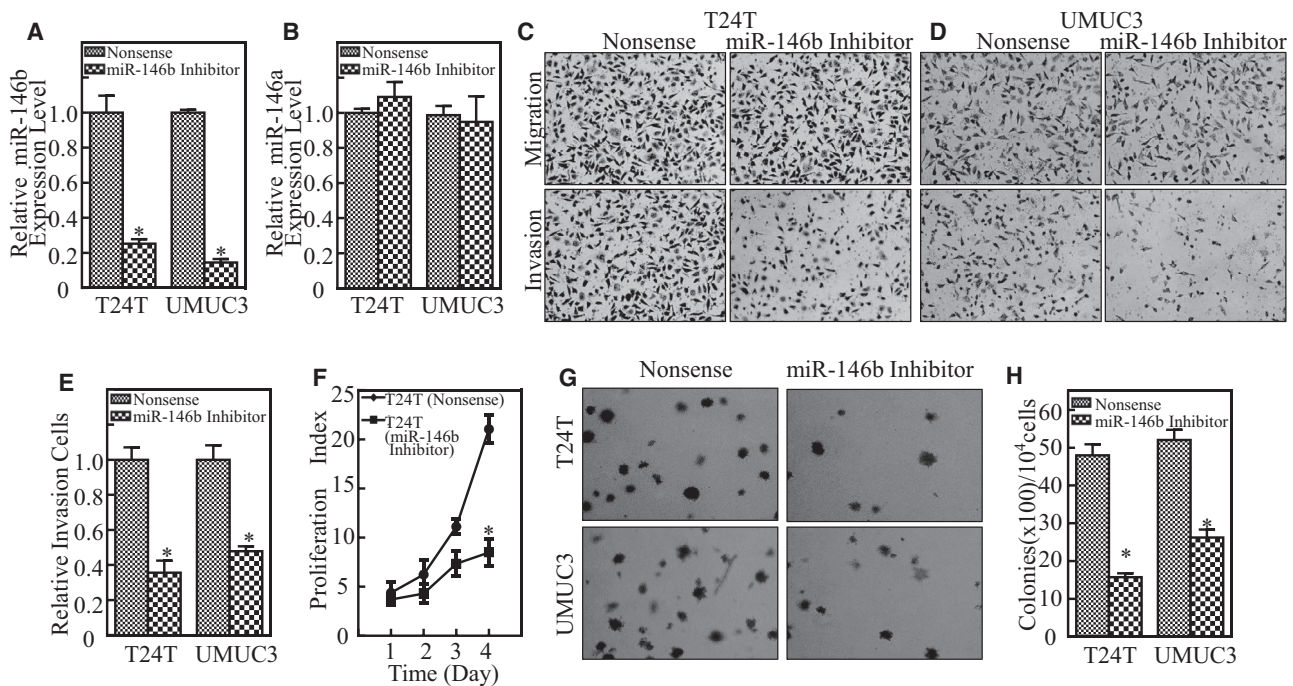

**Figure 2. miR-146b Overexpression Was Crucial for Human Bladder Cancer Cell Invasion and Anchorage-Independent Growth**

(A) miR-146b inhibitor and its nonsense control plasmids were stably transfected into T24T and UMUC3 cells, and stable transfectants were identified by real-time PCR. The error bars represent the mean  $\pm$  SD. Student's t test was used to determine the p value, and the asterisk (\*) indicates a significant decrease relative to nonsense control cells (\* $p < 0.05$ ). (B) miR-146a expression was detected in the indicated cells. The error bars represent the mean  $\pm$  SD. Student's t test was used to determine the p value. (C–E) The invasion abilities of T24T (miR-146b inhibitor) (C), UMUC3 (miR-146b inhibitor) (D), and their nonsense transfectants were determined by using BD BioCoat Matrigel Invasion Chamber applied with the matrigel (E). The error bars represent mean  $\pm$  SD from three independent experiments. Student's t test was utilized to determine the p value, and the asterisk (\*) indicates a significant decrease as compared with nonsense control transfectants, \* $p < 0.05$ . (F) T24T transfectants as indicated were plated in 96-well plates at a density of 5,000 cells/well. The cell culture medium was then replaced with 0.1% FBS DMEM-F12 (1:1) and cultured for 12 h. The cells were replaced with normal medium and cultured for another 1, 2, 3, or 4 days. Subsequently, ATP activity assay was performed using the protocol described in the [Materials and Methods](#). The asterisk (\*) indicates a significant decrease from nonsense control. (G) The indicated cells were subjected to anchorage-independent soft agar assay using the protocol described in the [Materials and Methods](#). Representative images of colonies of indicated cells were photographed under an Olympus DP71. (H) The number of colonies was counted with more than 32 cells of each colony, and the results were presented as colonies per 10<sup>4</sup> cells; the error bars show mean  $\pm$  SD from three independent experiments. The asterisk (\*) indicates a significant decrease in comparison to those of nonsense control transfectants (\*\* $p < 0.05$ ).

### MMP2 Was a miR-146b Downstream Effector for Bladder Cancer Cell Invasion

To elucidate the mechanism underlying the miR-146b regulation of bladder cancer invasion, the expression levels of MMP2, MMP9, N-Cadherin, and RhoGDI $\beta$  were determined in miR-146b inhibition transfectants in comparison to their nonsense transfectants. As shown in [Figures 3A](#) and [3B](#), a deficiency of miR-146b resulted in the upregulation of TRAF6 and IRAK1 expression (known targets of miR-146b) and a dramatic attenuation of abundance of MMP2 protein in both T24T and UMUC3 cells, while there was no consistent impact on the expression of MMP9, N-Cadherin, and RhoGDI $\beta$  under the same experimental conditions in both cells.

MMP2 possesses the function of enzymatic activity and plays a vital role in mediating the degradation of type IV collagen, which is a major structural component of the basement membrane of tissues.<sup>16</sup> Our recent study revealed that MMP2 overexpression is crucial for

human bladder cancer invasion,<sup>17</sup> whereas the inhibition of MMP2 expression by the anti-cancer agent isorhapontigenin (ISO) dramatically attenuated both bladder cancer invasion *in vitro* and highly invasive bladder cancer formation *in vivo*.<sup>18</sup> Given the critical role of MMP2 in bladder cancer invasion, the upregulation of MMP2 by miR-146b may play a major role in its promotion of bladder cancer invasion.

To investigate the mechanisms underlying the miR-146b upregulation of MMP2 protein, we first examined its mRNA levels. The results showed that *mmp2* mRNA was markedly decreased in miR-146b inhibition transfectants ([Figure 3C](#)). Further, human *mmp2* promoter luciferase reporter was then transfected into T24T (miR-146b inhibitor) and T24T (nonsense) cells. The results showed that the inhibition of miR-146b decreased *mmp2* promoter-driven reporter transcription activity in T24T cells ([Figure 3D](#)).

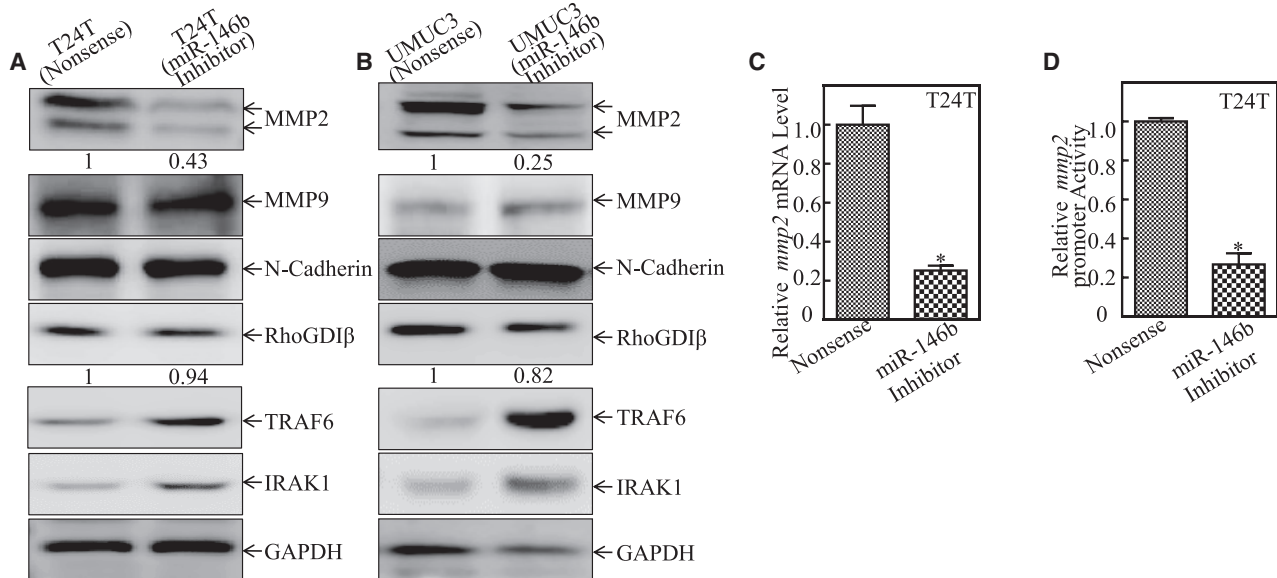

**Figure 3. miR-146b Overexpression Promoted *mmp2* mRNA Transcription in Human Bladder Cancer Cells**

(A and B) The indicated cell extracts were subjected to western blot to determine the protein expressions of MMP2, MMP9, N-Cadherin, and RhoGDI $\beta$ . TRAF6, IRAK1, and GAPDH were used as protein loading controls. (C) T24T (miR-146b inhibitor) and T24T (nonsense) cells were cultured in 6-well plates until cell density reached 70%–80%. Following synchronization for 12 h, the medium was then replaced with 5% FBS DMEM-Ham's F12 for another 12 h, and the cells were extracted for total RNA with Trizol reagent. Real-time PCR was used to determine *mmp2* mRNA expression, and  $\beta$ -Actin was used as an internal control. Data represent mean  $\pm$  SD (\* $p < 0.05$ ). (D) Human *mmp2* promoter-driven luciferase reporter was used to evaluate its promoter transcription activity in the indicated transfectants. The results were normalized by internal TK activity. The error bars represent the mean  $\pm$  SD. Student's *t* test was used to determine the *p* value, and the asterisk (\*) indicates a significant decrease relative to nonsense control cells (\* $p < 0.05$ ).

#### miR-146b Increased *mmp2* Transcription through Elevating ETS2 Protein Expression

The above results demonstrate that miR-146b increased *mmp2* mRNA transcription in human bladder cancer and that MMP2 is crucial for miR-146b-induced human bladder cancer invasion. To investigate the mechanisms underlying the miR-146b-increased *mmp2* transcription, we bioinformatically analyzed the potential transcriptional factors that could bind to the  $-1,459$  to  $-42$  region of the *mmp2* promoter (Figure 4A). Then we evaluated the expression of these transcription factors in both miR-146b-knockdown cells and their scramble nonsense transfectants. The results showed that only ETS2 exhibited low expression, while others showed no significant differences by the inhibition of miR-146b (Figures 4B and 4C), suggesting that ETS2 might be the effector for regulating MMP2 expression.

To further test the role of ETS2, the plasmid of FLAG-ETS2 was stably transfected into T24T (miR-146b inhibitor) cells (Figure 4D). The results showed that overexpression of ETS2 remarkably increased MMP2 protein expression (Figure 4D) and promoted *mmp2* promoter-driven luciferase reporter transcriptional activity (Figure 4E). Moreover, the chromatin immunoprecipitation (ChIP) assay was carried out by using anti-ETS2 antibody, and the results showed that ETS2 could directly bind to the *mmp2* promoter, as shown in Figure 4F, demonstrating that ETS2 does act as a transcription factor of the *mmp2* promoter. Furthermore, the invasion ability of T24T

(miR-146b inhibitor/FLAG-ETS2) was elevated as compared to T24T (miR-146b inhibitor/vector) cells (Figures 4G and 4H). Collectively, our results strongly demonstrate that ETS2 is the critical factor mediating miR-146b promotion of bladder cancer invasion through directly binding to the *mmp2* promoter, thereby promoting MMP2 expression.

#### miR-146b Promoted ETS2 Protein Expression through Elevating Its mRNA Stability

To investigate the mechanisms underlying miR-146b's upregulation of ETS2 protein, we first examined its mRNA levels by real-time PCR. Consistent with protein abundance in T24T (miR-146b inhibitor) and T24T (nonsense), *ets2* mRNA levels were profoundly impaired in miR-146b inhibition transfectants (Figure 5A). The *ets2* promoter-driven luciferase reporter and PGL3 basic luciferase reporter were next transfected into T24T (miR-146b inhibitor) cells, and the stable transfectants were then used to assess the potential miR-146b upregulation of *ets2* mRNA transcription. The results showed that *ets2* promoter transcriptional activity was comparable between T24T (miR-146b inhibitor) and T24T (nonsense) transfectants (Figure 5B), excluding the possibility that miR-146b upregulation of *ets2* mRNA transcription. Therefore, we explored the possibility that miR-146b stabilizes *ets2* mRNA. Upon inhibition of new mRNA transcription with Actinomycin D (Act D), *ets2* mRNA



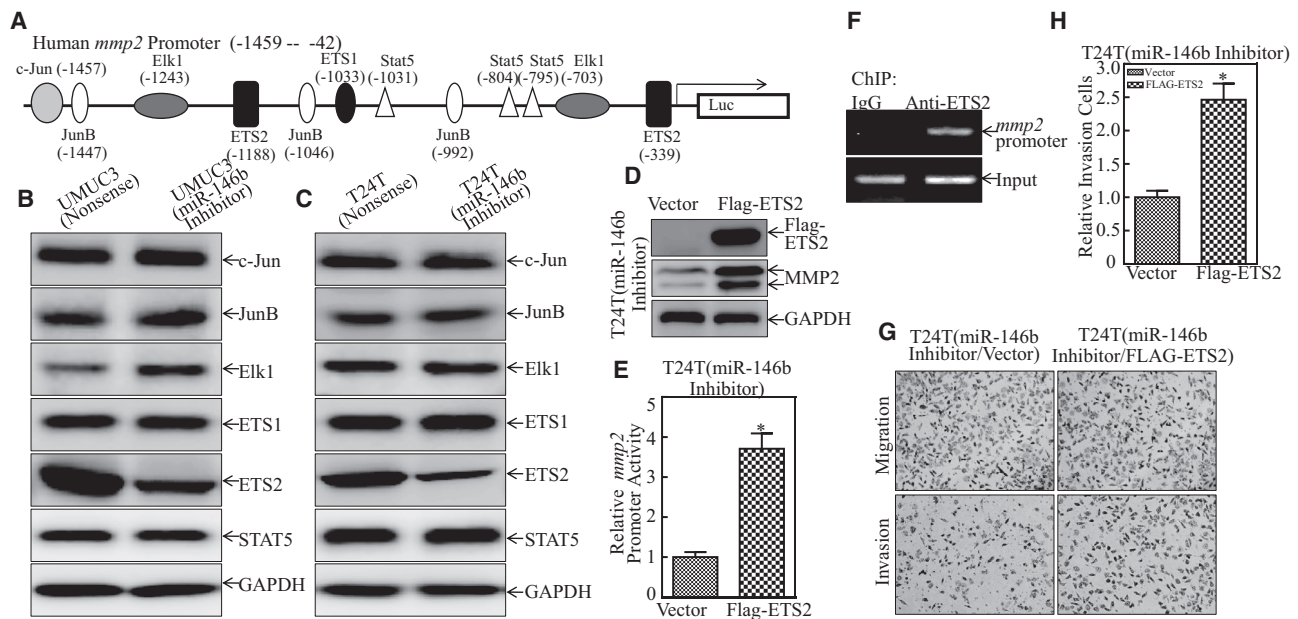

**Figure 4. ETS2 is a miR-146b-Regulated Transcription Factor Mediating MMP2 Upregulation in Human Bladder Cancer Cells**

(A) Potential transcription factor-binding sites in the *mmp2* promoter region (–1,459 to –42) were analyzed by using the TRANSFAC 8.3 engine online. (B and C) The indicated cell extracts were subjected to western blot for determination of the expression of c-Jun, JunB, Elk1, ETS2, and STAT5. GAPDH was used as a protein loading control. The results represented one of three independent experiments. (D) The overexpressed FLAG-ETS2 plasmid was stably transfected into T24T (miR-146b inhibitor) cells, and the cell extracts were then subjected to western blot for the determination of FLAG, ETS2, and MMP2 expressions, and GAPDH was used as a protein loading control. (E) The *mmp2* promoter-driven luciferase reporter together with the TK reporter was transfected into the indicated cells. Luciferase activity of each transfectant was evaluated and the error bars show mean  $\pm$  SD from three independent experiments. The asterisk (\*) indicates a significant increase as compared with nonsense transfectant ( $p < 0.05$ ). (F) ChIP assay was carried out using anti-ETS2 antibody to detect the interaction of ETS2 with the *mmp2* promoter. (G and H) The invasion abilities of T24T (miR-146b inhibitor/vector) and T24T (miR-146b inhibitor/FLAG-ETS2) cells were determined, as described in the *Materials and Methods*. The error bars represent mean  $\pm$  SD from three independent experiments. Student's *t* test was utilized to determine the *p* value. The asterisk (\*) indicates a significant increase in comparison to T24T (miR-146b inhibitor/vector) ( $*p < 0.05$ ) (H).

degradation rates in T24T (miR-146b inhibitor) were much faster than in T24T (nonsense) cells (Figure 5C). Collectively, our results reveal that miR-146b overexpression plays an essential role in maintaining *ets2* mRNA stability.

#### miR-146b Stabilized *ets2* mRNA through Attenuating AUF1 Protein Expression

AUF1, one of the best-characterized ARE-binding proteins (AUBPs), is able to bind to many ARE-mRNAs and assemble other factors necessary in the recruitment of the mRNA degradation machinery.<sup>19</sup> HuR, a ubiquitously expressed member of the Hu family of RNA-binding proteins, related to *Drosophila* ELAV, selectively binds AREs and stabilizes ARE-containing mRNAs when overexpressed in cultured cells,<sup>20</sup> while NCL is a protein, primarily in the nucleus, that has four RNA-binding domains and can stabilize mRNA.<sup>21</sup> To determine the upstream regulators mediating *ets2* mRNA stabilization by miR-146b, AUF1, HuR, and NCL were tested and compared in T24T (miR-146b inhibitor) and T24T (nonsense) cells.

As the data show in Figure 6A, while HuR and NCL proteins were comparable between T24T (miR-146b inhibitor) and T24T

(nonsense) cells, AUF1 was elevated in miR-146b inhibition cells. These results exclude the participation of HuR and NCL in the miR-146b stabilization of *ets2* mRNA. Thus, we knocked down AUF1 in T24T (miR-146 inhibitor) cells by using short hairpin RNAs (shRNAs) specifically targeting human AUF1 and the stable transfectants; T24T (miR-146 inhibitor/shAUF1#1), T24T (miR-146 inhibitor/shAUF1#2), and its scramble transfectant T24T (miR-146 inhibitor/nonsense) were established and identified (Figure 6B). As expected, AUF1 knockdown in T24T (miR-146 inhibitor) cells led to increased expression of ETS2 and MMP2 protein (Figure 6B), and it restored *ets2* mRNA stability as well as bladder cancer cell invasion (Figures 6C–6E), suggesting that AUF1 might be a mediator linking miR-146b to ETS2 and associated with bladder cancer invasion. To determine whether AUF1 is able to directly bind to *ets2* mRNA, RNA-IP assay was performed in HEK293T cells that expressed hemagglutinin (HA)-AUF1. The results showed that AUF1 did bind to *ets2* mRNA (Figure 6F). Taken together, our results demonstrate that miR-146 inhibits AUF1 expression, which results in less AUF1 binding to *ets2* mRNA, consequently leading to *ets2* mRNA stabilization, in turn promoting *mmp2* mRNA transcription and protein expression, and finally enhancing bladder cancer invasion.

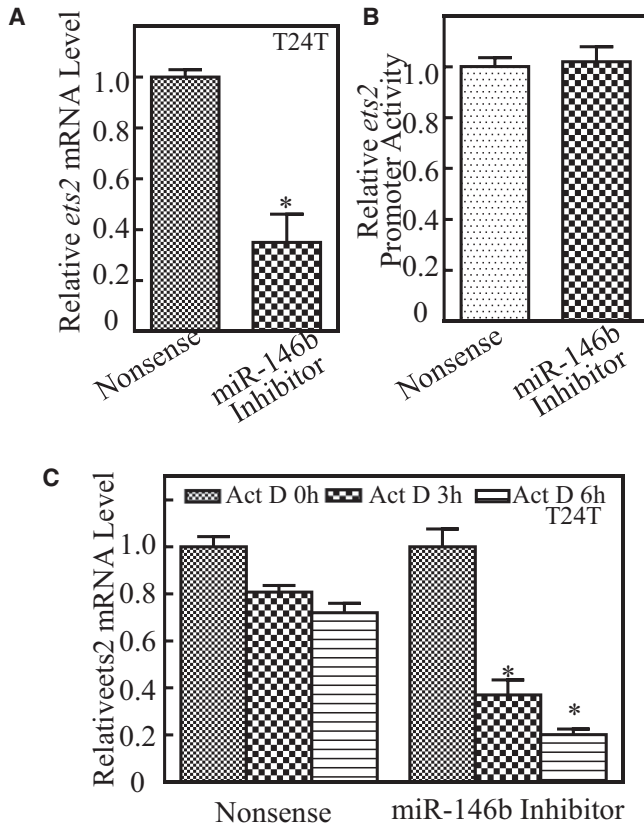

**Figure 5. miR-146b Overexpression Promoted ETS2 Expression by Stabilizing Its mRNA**

(A) T24T (miR-146b inhibitor) and T24T (nonsense) cells were cultured in 6-well plates until cell density reached 70%–80%. Following synchronization for 12 h, the medium was then replaced with 5% FBS DMEM-Ham's F12 for another 12 h, and the cells were extracted for total RNA with Trizol reagent. Real-time PCR was used to determine *ets2* mRNA expression, and  $\beta$ -Actin was used as an internal control. Data represent mean  $\pm$  SD ( $p < 0.05$ ). (B) Human *ets2* promoter-driven luciferase reporter was used to evaluate its promoter transcription activity in the indicated transfectants. The results were normalized by internal TK activity. (C) T24T (miR-146b inhibitor) and T24T (nonsense) cells were seeded into 6-well plates. After synchronization, the indicated cells were treated with Actinomycin D (Act D) for the indicated time points. Total RNA was then isolated and subjected to real-time PCR analysis for mRNA levels of *ets2*, and  $\beta$ -Actin was used as an internal control. The error bars represent mean  $\pm$  SD from three independent experiments. Student's t test was utilized to determine the p value. The asterisk (\*) indicates a significant decrease in comparison to T24T (nonsense) cells ( $p < 0.05$ ).

#### miR-146b Promoted *auf1* mRNA Degradation by Directly Targeting Its 3' UTR

To elucidate how miR-146 inhibits AUF1 protein expression, we assessed the effect of miR-146 on *auf1* mRNA abundance in T24T cells. As shown in Figure 7A, *auf1* mRNA's level was elevated in miR-146b inhibition transfectants as compared with its scramble nonsense transfectants. Therefore, we explored the possibility that miR-146 destabilizes *auf1* mRNA. Upon the inhibition of new mRNA transcription with Act D, *auf1* mRNA degradation rates in T24T (nonsense)

were much faster than in T24T (miR-146b inhibitor) cells (Figure 7B), consistent with the observation of miR-146 destabilization of *auf1* mRNA. miRNAs play biological roles by modulating target gene expression via their binding to the 3' UTR of target genes to cause mRNA stability alteration or protein translation suppression.<sup>22</sup> Therefore, we next evaluated the *auf1* mRNA 3' UTR activity between T24T (nonsense) and T24T (miR-146b inhibitor) cells. The results showed that *auf1* mRNA 3' UTR activity in T24T (miR-146b inhibitor) cells was significantly higher than that observed in T24T (nonsense) cells (Figure 7C), revealing that miRNAs might be involved in this regulation. To test this notion, a bioinformatics search for putative miRNAs that could potentially target the 3' UTR of *auf1* mRNA was performed using TargetScan (version [v.] 7.0; [http://www.targetscan.org/vert\\_72/](http://www.targetscan.org/vert_72/)).<sup>23</sup> Surprisingly, the results indicated that there were multiple putative miRNA-binding sites in the 3' UTR of *auf1* mRNA, including binding sites for miR-146b (Figure 7D).

To test whether miR-146b is able to bind to the 3' UTR of *auf1* mRNA directly for stabilization of *auf1* mRNA, the mutation of the miR-146b-binding site in *auf1* mRNA 3' UTR luciferase reporter was constructed, as indicated in Figure 7D. *Auf1* mRNA 3' UTR luciferase reporter or *auf1* mRNA 3' UTR luciferase reporter with the mutation of miR-146b-binding sites was transiently co-transfected with pRL-TK into T24T (miR-146b inhibitor) and T24T (nonsense) cells. The results showed that *auf1* mRNA 3' UTR luciferase activity was significantly increased in T24T (miR-146b inhibitor) cells as compared to T24T (nonsense) cells, whereas the miR-146b-binding site mutation in *auf1* 3' UTR luciferase reporter attenuated the responses of T24T cells to miR-146b inhibition (Figure 7E). These results strongly demonstrate that the direct binding of miR-146b to the 3' UTR of *auf1* mRNA is crucial for miR-146b stabilization of *auf1* mRNA. Taken together, our results demonstrate that miR-146b overexpression decreases *auf1* mRNA expression by directly binding to its 3' UTR, therefore stabilizing *ets2* mRNA, in turn increasing *mmp2* mRNA transcription and protein expression, and finally promoting bladder cancer invasion, as diagrammed in Figure 7F.

#### DISCUSSION

Invasive bladder cancer has been a persistent challenge for scientists and urologists for the past decades due to its poor prognosis, even when applying current therapeutic strategies.<sup>24</sup> A better understanding of the molecular mechanisms involved in the invasion ability of bladder cancer could contribute to the discovery of therapeutic targets, which is urgently needed to help the increasing number of bladder cancer patients.

Accumulating evidence from preclinical and clinical studies has shown that miRNAs play in the development of human malignancies has been evidenced.<sup>25</sup> Although miRNAs exert their functions through sequence-specific binding to the mRNA of their target genes, it has been revealed that miRNAs also have cell type-specific signatures on target mRNA expression and are stage specific during cancer progression.<sup>18</sup> Dysregulation of miR-146b has been documented in a

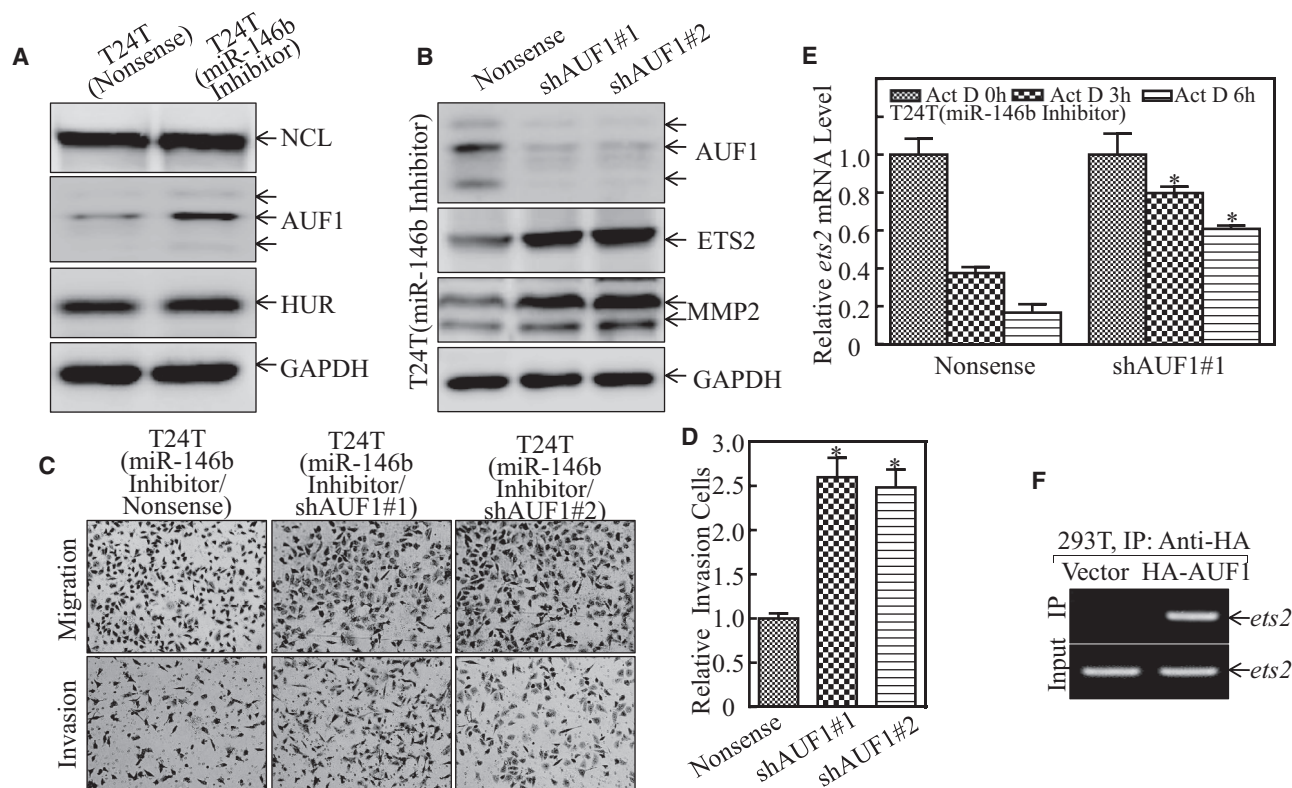

**Figure 6. AUF1 Was a miR-146b Downstream Effector Responsible for the Destabilization of *ets2* mRNA via Direct Binding**

(A) The indicated cell extracts were subjected to western blot for the determination of NCL, HuR, and AUF1 protein expression levels. (B) AUF1-knockdown constructs were stably transfected into T24T (miR-146b inhibitor) cells. The indicated cell extracts were subjected to western blot for the determination of AUF1, ETS2, and MMP2 protein expression levels. The stable transfectants were used to determine their invasion abilities in comparison to nonsense control transfectants, as described in the [Materials and Methods](#). (C and D) The images were photographed under an Olympus DP71, the number of the cells was counted by the software Image J, and the invasion rate was normalized with the insert control according to the manufacturer's instructions (C). The results are presented with the mean  $\pm$  SD from triplicate. Student's t test was utilized to determine the p value; the double asterisk (\*\*) indicates a significant decrease in comparison to scramble vector transfectants (\*\* $p < 0.05$ ), while the single asterisk (\*) indicates a significant increase in comparison to T24T (miR-146b inhibitor/nonsense) transfectants (\* $p < 0.05$ ) (D). (E) *Ets2* mRNA stability was evaluated by real-time PCR in the presence of Act D in T24T (miR-146b inhibitor/shAUF1) cells and its nonsense control. The results are presented with the mean  $\pm$  SD from triplicate. Student's t test was utilized to determine the p value (\* $p < 0.05$ ). (F) The HA-AUF1 construct was transfected into 293T cells and HA-AUF1 protein was pulled down with anti-HA beads. The mRNAs bound to AUF1 protein were used to carry out RT-PCR for the determination of *ets2* mRNA expression.

variety of human malignancies, including gastric cancer,<sup>26</sup> thyroid carcinoma,<sup>27</sup> osteosarcoma,<sup>28</sup> and glioma.<sup>29</sup> The role of miR-146b as an oncogene was first identified in papillary thyroid carcinoma, which showed that the overexpression of miR-146b is associated with the aggressiveness of papillary thyroid carcinoma.<sup>30</sup> miR-146b, as a downstream regulator of BCR-ABL1, promotes the leukemic transformation of hematopoietic cells by targeting several important genes (NUMB, NOTCH2, BRCA1, etc.) to affect cell proliferation and genome instability.<sup>31</sup> However, conflicting results that support the role of miR-146b as a tumor suppressor have also been reported. miR-146b is significantly dysregulated in human glioblastoma tissues. miR-146b overexpression inhibits glioma cell migration and invasion by targeting MMP16.<sup>32</sup> In the current study, miR-146b is shown to be upregulated in highly invasive bladder cancer cells, in comparison to human normal bladder urothelial cells. The upregulation of miR-146b is also observed in human invasive bladder cancers in compar-

ison to their adjacent normal bladder tissues. Inhibition of miR-146b significantly inhibited bladder cancer invasion. Moreover, we define MMP2 as the miR-146b downstream effector responsible for its mediation of bladder cancer invasion. Our results provide evidence of a first-time link between miR-146b overexpression and bladder cancer invasion, which offers new insight into the therapeutic targeting of miR-146b for advanced bladder cancers.

As a family of proteolytic enzymes, the MMPs degrade multiple components of the extracellular matrix. A variety of clinical and experimental evidence has implicated that MMPs play a critical role in tumor neoangiogenesis, invasion, and metastasis, and therefore they represent ideal pharmacologic targets for cancer therapy.<sup>33,34</sup> Among them, MMP2 hydrolyzes type IV collagen primarily, which is the major structural component of the basement membrane.<sup>33,35</sup> Multiple studies have verified that MMP2 is critical for mediating bladder

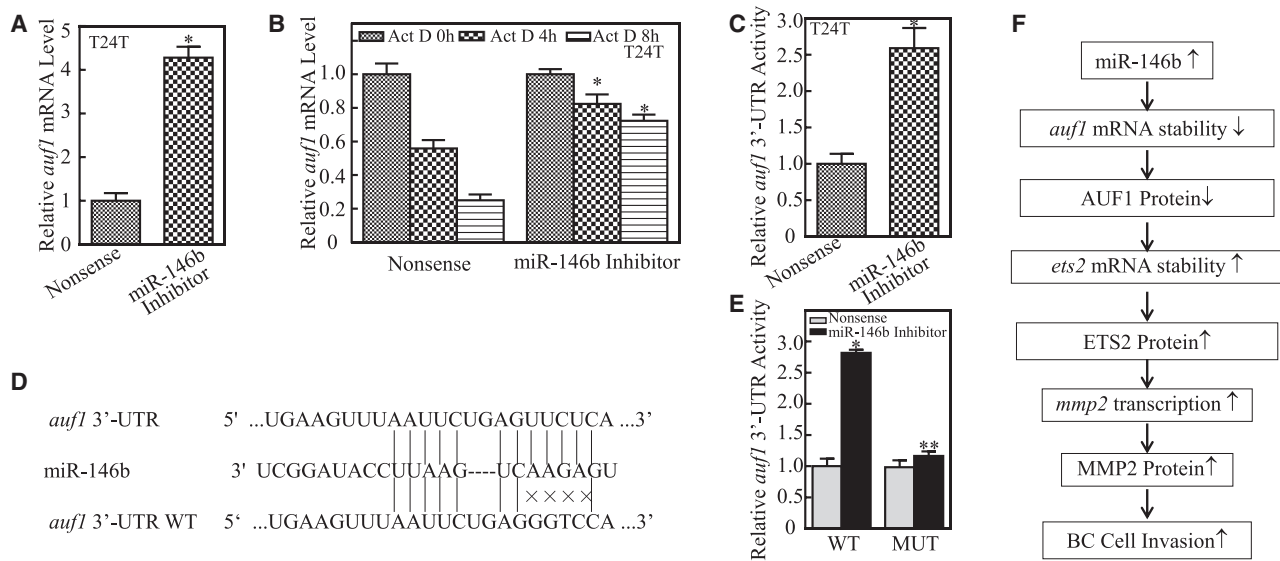

**Figure 7. miR-146b Was Responsible for the Destabilization of *auf1* mRNA via Direct Binding to Its 3' UTR**

(A) T24T (miR-146b inhibitor) and T24T (nonsense) cells were cultured in 6-well plates until cell density reached 70%–80%. Following synchronization for 12 h, the medium was then replaced with 5% FBS DMEM–Ham's F12 for another 12 h, and the cells were extracted for total RNA with Trizol reagent. Real-time PCR was used to determine *auf1* mRNA expression, and  $\beta$ -Actin was used as an internal control. Data represent mean  $\pm$  SD ( $*p < 0.05$ ). (B) T24T (miR-146b inhibitor) and T24T (nonsense) cells were seeded into 6-well plates. After synchronization, the indicated cells were treated with Act D for the indicated time points. Total RNA was then isolated and subjected to real-time PCR analysis for mRNA levels of *auf1*, and  $\beta$ -Actin was used as an internal control. The error bars represent mean  $\pm$  SD from three independent experiments. Student's *t* test was utilized to determine the *p* value. The asterisk (\*) indicates a significant increase in comparison to T24T (nonsense) cells ( $*p < 0.05$ ). (C) The pMIR-*AUF1* 3' UTR reporter was transiently transfected into the indicated cells, and luciferase activity of each transfectant was evaluated. The luciferase activity was presented as a relative to nonsense transfectant with normalization by using pRL-TK as an internal control. The error bars show mean  $\pm$  SD from three independent experiments. The asterisk (\*) indicates a significant increase in T24T (miR-146b inhibitor) in comparison to nonsense transfectant ( $p < 0.05$ ). (D) The predicted miR-146b-binding site existed in the 3' UTR of *auf1* mRNA, and its mutants (MUTs) were generated in the binding site. (E) The pMIR-*AUF1* 3' UTR reporters (WT and MUT) were co-transfected with pRL-TK into the indicated cells. At 24 h post-transfection, the transfectants were extracted for determination of the luciferase activity, and TK was used as the internal control. Luciferase activity of each transfectant was evaluated, and the results were presented as relative *AUF1* 3' UTR activity. The error bars show mean  $\pm$  SD from three independent experiments. The double asterisk (\*\*) indicates a significant inhibition of 3' UTR activity in mutant transfectant in comparison to the mutant of WT *AUF1* 3' UTR luciferase reporter transfectant ( $p < 0.05$ ). (F) The proposed mechanisms underlying miR-146b overexpression in the promotion of human bladder cancer cell invasion. miR-146b overexpression destabilizes *auf1* mRNA, which further elevates *ets2* mRNA stability, in turn promoting the transcription of *MMP2* and protein expression, and finally it increases the invasion ability of human bladder cancer cells.

cancer invasion,<sup>36</sup> but the maintenance of MMP2 abundance has not been well studied. Based on our results here, miR-146b overexpression significantly increases MMP2 protein level, which is known to regulate bladder cancer cell invasion. Interestingly, the inhibition of miR-146b greatly impaired *mmp2* mRNA transcription in bladder cancer cells, finally inhibiting bladder cancer invasion ability. To the best of our knowledge, this is the first study of a cross-talk between miR-146b and the regulation of *mmp2* mRNA transcription.

The ETS family of transcription factors has the conserved primary sequence of their DNA-binding domains that binds to a purine-rich GGA(A/T) core sequence.<sup>37,38</sup> ETS proteins play crucial roles in cell proliferation, differentiation, development, stem cell development, transformation, and angiogenesis, and they participate in the malignancy of tumor cells by activating the transcription of several cancer-related genes, such as proteases and angiogenesis-related genes.<sup>39</sup> Binding sites for the ETS family are found in promoters of the MMP family,<sup>40</sup> and the regulation of matrix-degrading prote-

ases by ETS factors in tumor invasion and metastasis is well established.<sup>41</sup> In this study, we found that miR-146b overexpression promoted ETS2 protein expression. The results of our ChIP assay showed that ETS2 could directly bind to the *mmp2* promoter and increase MMP2 protein expression, evidence demonstrating the oncogenic role of ETS2 in bladder cancer. However, a tumor suppressor function of ETS2 has previously been reported through the activation of the miR-196b/FOXO1/p27-signaling pathway in human bladder cancer cells.<sup>42</sup> These results reveal that the prognosis value of ETS2 depends on its downstream targets in the specific signaling axis of bladder cancer cells.

AUF1, one of the best-characterized RNA-binding proteins, has been reported to decrease the stability of some target transcripts.<sup>43</sup> AUF1 might elicit anti-tumorigenic roles as a destabilizing agent for the mRNAs encoding the anti-apoptotic protein Bcl-2 and the proliferative protein cyclinD1,<sup>44,45</sup> and it can also suppress the expression of pro-inflammatory factors (e.g., interleukin [IL]-6,



granulocyte-macrophage colony stimulating factor [GM-CSF], iNOS, and COX-2) by binding to the mRNAs that encode them, repressing their production, and thereby suppressing a pro-transformation state.<sup>46</sup> The current study provides strong evidence from this study showing that miR-146b overexpression downregulates AUF1 expression. Mechanistic studies reveal that AUF1 is responsible for destabilizing *ets2* mRNA by directly binding to it. AUF1 serves as a miR-146b downstream effector for the promotion of bladder cancer invasion. Such tumor suppressor properties of AUF1 in human bladder cancers are also in agreement with our recent findings that ATG7/autophagy-mediated AUF1 protein degradation expression promotes the bladder cancer invasion abilities,<sup>47</sup> suggesting that the elevation of AUF1 might be of therapeutic benefit for human bladder cancer patients.

AUF1 expression could be regulated at multiple levels, including mRNA transcription, mRNA stability, and protein translation and degradation. miRNAs, a class of small (21- to 23-nt) non-protein-coding RNAs, could regulate either mRNA stability or protein translation.<sup>48</sup> Recently, Al-Khalaf and Aboussekhra<sup>12</sup> demonstrated that the tumor suppressor functions of miR-146b are mediated through the repression of the oncogenic potentials of AUF1 in osteosarcoma cells. In the current study, miR-146b overexpression reduced *auf1* mRNA stability and protein expression. We also show that the *AUF1* 3' UTR luciferase reporter activity is remarkably increased in miR-146b inhibition transfectant and such elevation can be completely impaired if the miR-146b-binding site on *AUF1* 3' UTR luciferase reporter is mutated. We conclude that miR-146b exerts its oncogenic role in human bladder cancer cells through its directly inhibiting AUF1 expression.

In summary, the present study defines that miR-146b is overexpressed in both human bladder cancer tissues and cell lines. Our studies have revealed a new AUF1/ETS2/MMP2 pathway that is responsible for the oncogenic role of miR-146b in bladder cancer invasion. miR-146b overexpression destabilizes *auf1* mRNA via directly binding to its 3' UTR, further elevates *ets2* mRNA stability followed by promoting *mmp2* mRNA transcription and protein expression, and finally promotes the invasion ability of human bladder cancer cells. Our new findings raise the potential for developing a miR-146b-based specific therapeutic strategy for the treatment of human bladder cancer patients.

## MATERIALS AND METHODS

### Plasmids, Antibodies, and Reagents

The miR-146b inhibitor and its nonsense control were purchased from System Biosciences (pLKO.1-miRZip146b) (Palo Alto, CA, USA). The plasmids were transfected into bladder cancer cells by using PolyJet DNA *In Vitro* Transfection Reagent (SignaGen Laboratories, Gaithersburg, MD, USA), according to the manufacturer's instructions, and stable transfectants were selected with puromycin (0.2–0.3 mg/mL) for 3 or 4 weeks to get the stable miR-146 inhibition bladder cancer cells. The plasmid of the human *mmp2* promoter-

(from –1,459 to –42) driven luciferase reporter was constructed with Xho I and Hind III, using genomic DNA purified from UMUC3 cells based on the NCBI database (GenBank: NC\_000016). The human *AUF1* 3' UTR was cloned into the pMIR-reporter luciferase vector through the Xho I and Sac I sites. The *AUF1* 3' UTR point mutation was amplified from the wild-type (WT) template by overlap PCR using the following primers: forward, 5'-CCCTCTGAAGTTTAAGGTCGAGTTCTCATTAATAA-3'; reverse, 5'-TTTTAATGA GAAGTCGACCTTAAACTTCAGAGGG-3'. The HA-tagged AUF1 constitutively expressed plasmid was obtained from Addgene (Cambridge, MA, USA). The constructs of shRNA specifically targeting AUF1 (shAUF1) were purchased from GeneCopoeia (Rockville, MD, USA). All plasmids were prepared by the Plasmid Preparation/Extraction Maxi Kit from QIAGEN (Valencia, CA, USA). The plasmid of FLAG-ETS2 was kindly gifted by Dr. Wen-chang Lin from the Institute of Biomedical Sciences, Academic Sinica, Nankang, Taipei 115, Taiwan, China.<sup>49</sup> The antibodies specific against N-Cadherin, c-Jun, Elk1, ETS1, STAT5, GAPDH, and HuR were bought from Cell Signaling Technology (Beverly, MA, USA). The antibody specific against AUF1 was purchased from Aviva Systems Biology (San Diego, CA, USA). Antibodies against MMP2, MMP9, JunB, ETS2, NCL, and RhoGDI $\beta$  were bought from Santa Cruz Biotechnology (Dallas, TX, USA). Act D was bought from Calbiochem (Billerica, MA, USA).

### Cell Culture and Transfection

The human bladder cancer cell lines RT4, T24, T24T, and UMUC3 and the normal urinary epithelial cell lines SV-HUC-1 were used in the study. All cancer cell lines were generously provided by Dr. Haishan Huang (Wenzhou Medical University, Zhejiang, China), and they were subjected to DNA tests and authenticated before use for the studies. UMUC3 cells were maintained at 37°C in a 5% CO<sub>2</sub> incubator in DMEM (Gibco, Grand Island, NY, USA), supplemented with 10% fetal bovine serum (FBS) (Gibco, Grand Island, NY, USA). T24 and T24T cells were cultured with a 1:1 mixture of DMEM-Ham's F12 medium (Gibco, Grand Island, NY, USA), supplemented with 5% FBS. RT4 cells were cultured with 1640 (Gibco, Grand Island, NY, USA), supplemented with 10% FBS. SV-HUC-1 cells were cultured with F-12K medium supplemented with 10% FBS. Stable transfections were performed with constructs using PolyJet DNA *In Vitro* Transfection Reagent (SignaGen Laboratories, Gaithersburg, MD, USA), according to the manufacturer's instructions, and stable transfectants were selected with puromycin (0.2–0.3 mg/mL) or hygromycin B (200–400 mg/mL) for 3 or 4 weeks according to the different antibiotic resistance plasmids transfected.<sup>42,50</sup>

### Western Blot Analysis

Bladder cancer cells were seeded in six-well plates and cultured in normal culture medium until 70%–80% confluence. The whole-cell extracts were then prepared, as described in the previous studies.<sup>51,52</sup> Cell extracts were subjected to western blot analysis, as previously described.<sup>53</sup> The images were acquired by scanning with the phosphor imager (Typhoon FLA 7000, GE Healthcare).

### Real-Time qPCR

First, we extracted the RNA from the cultured cells and tissues using TRIzol reagent (Invitrogen, USA).

Reverse transcriptase was used to produce the first-strand cDNA (Aidlab, China), according to the manufacturer's instructions. miRNA Real-time PCR Assay kit (Aidlab, China) was used to detect the expression level of miR-146b. Furthermore, U6 was chosen to be the internal control. The primers used in this study were as follows: miR-146b (forward 5'-TGACCCATCCTGGGCCTCAA-3', reverse 5'-CCAGTGGGCAAGATGTGGGCC-3'), U6 (forward 5'-CTCGCTTCGGCAGCAC-3', reverse 5'-AACGCTTACGAATTGCGT-3'), human MMP2 (forward 5'-CAAGTGGGACAAGAACAG-3', reverse 5'-CCAAAGTTGATCATGTC-3'), human AUF1 (forward 5'-AAATTGAATGGGAAGGTGAT-3', reverse 5'-GAACCCACGCCTTATTG-3'), human ETS2 (forward 5'-AGCGTCACCTACTGCTCTGTCA-3', reverse 5'-CCGTTGCACATCCAGCAA-3'), and human GAPDH (forward 5'-GATGATCTTGAGGCTGTTGTC-3', reverse 5'-CAGGGCTGCTTTAACTCTG-3').

### Luciferase Assay

For the determination of *mmp2* promoter-driven luciferase activity and *ets2* promoter-driven luciferase activity, the indicated cells were each transiently co-transfected with pRL-TK, together with the related promoter-driven luciferase reporter. At 24 h after transfection, luciferase activity was determined using the Luciferase Assay System Kit (Promega, Madison, WI, USA). For the determination of *auf1* mRNA 3' UTR activity, T24T (nonsense) and T24T (miR-146b inhibitor) cells were transiently transfected with pRL-TK together with *auf1* mRNA 3' UTR luciferase reporter. At 24 h after transfection, luciferase activity was determined using the Luciferase Assay System Kit (Promega, Madison, WI, USA). The results were normalized by internal TK signal. All experiments were done in triplicate and the results expressed as mean  $\pm$  SE.

### RNA-IP Assay

RNA immunoprecipitation was performed as previously described.<sup>42</sup> The RNAs in the buffer were extracted by TriZol reagent. Semiquantitative RT-PCR was performed to detect the ETS2 presented in the immune complex.

### ChIP Assay

ChIP assay was carried out as described previously by using reagents that were purchased from Millipore Technologies (Billerica, MA, USA).<sup>54</sup> Briefly, the indicated genomic DNA and the proteins were cross-linked with 1% formaldehyde (Protocol, 245-684). The cross-linked cells were pelleted, resuspended in lysis buffer, and sonicated to generate 200- 500-bp chromatin DNA fragments. After centrifugation, the supernatant fractions were diluted 10-fold and then incubated with anti-ETS2 antibody (Santa Cruz Biotechnology, sc-351) or the control rabbit immunoglobulin G (IgG) (Santa Cruz Biotechnology, sc-2027) overnight at 4°C, respectively. The immune complex was captured by protein G-agarose (Santa Cruz Biotechnology, C1014) saturated with salmon sperm DNA (Upstate Biotechnology,

0606031838), then eluted with the elution buffer. DNA-protein cross-linking was reversed by heating overnight at 65°C. DNA was purified and subjected to PCR analysis. To specifically amplify the region containing the putative responsive elements on the human *mmp2* promoter, PCR was performed with the following pair of primers: 5'-CCTAGGCTGGTCCTTACTG-3' and 5'-GCCCAGAGATGAAAAACAGC-3'. The PCR products were separated on 2% agarose gels and stained with ethidium bromide; the images were then scanned with a UV light.

### Cell Migration and Invasion Assay

Control inserts without matrigel and permeable support for a 24-well plate with 8.0- $\mu$ m transparent polyethylene terephthalate (PET) membrane were purchased from Corning (Corning, NY, USA), and the invasion kit was purchased from BD Biosciences (Bedford, MA, USA). The invasion assay was performed in normal cell culture serum according to the manufacturer's instructions. After incubation for 24 h, the cells both on the inside and outside of the chamber were fixed with 3.7% formalin for 2 min, washed twice, then transferred to 100% methanol for 20 min, washed twice again, and then finally the cells were stained by Giemsa (1:20 diluted with PBS) at room temperature for 15 min in the dark. They were again washed twice, then the non-invaded cells were scraped off with a cotton swab (PBS wetted) 4 times. The images were taken under an Olympus DP71 microscope (Olympus America, Center Valley, PA, USA), and the number of the cells in each image was counted by the software Image J. The invasion rate was normalized with the insert control according to the manufacturer's instructions.

### Cell Proliferation Analysis

Cell viability was determined by utilizing the CellTiter-Glo Luminescent Cell Viability Assay Kit (Promega, Madison, WI), according to the manufacturer's instructions. Briefly, cells were plated in 96-well plates at a density of 5,000 cells/well and allowed to adhere overnight. The cell culture medium was replaced with 0.1% FBS DMEM or 0.1% FBS DMEM-F12 (1:1) and cultured for 12 h; then it was replaced with normal medium and cultured for another 1, 2, 3, or 4 days, and then 50  $\mu$ L CellTiter-Glo assay reagent was added to each well. The contents were mixed on an orbital shaker for 2 min to induce cell lysis, and then they were incubated at room temperature for 10 min to stabilize the luminescent signal. Results were read on a microplate luminometer LB 96V (Berthold, Bad Wildbad, Germany). Cell viability (%) was defined as the relative absorbance of treated samples versus that of the untreated control. All experiments were performed in 96-well plates for each experiment and repeated at least three times.

### Anchorage-Independent Growth Assay

Anchorage-independent growth in soft agar (soft agar assay) was performed as described in our earlier study.<sup>42</sup> Briefly, the  $1 \times 10^4$  cells in 10% FBS Basal Medium Eagle (BME) containing 0.33% soft agar were seeded over the basal layer containing 0.5% agar containing 10% FBS BME in each well of 6-well plates. The plates were incubated in a 5% CO<sub>2</sub> incubator at 37°C for 3 weeks. Colonies were captured under a microscope and only colonies with over 32 cells were counted.

The results were presented as mean  $\pm$  SD obtained from three independent experiments.

### Clinical Specimens

In all, 30 pairs of bladder cancer tissues and matched adjacent non-tumor tissues from the patients were obtained between 2015 and 2018 from the Beilun People's Hospital and HwaMei Hospital, University of Chinese Academy of Sciences, Ningbo, Zhejiang, China. The patients' clinical characteristics are listed in Table S1. The current study was approved by the Ethics Review Board of Ningbo University, Ningbo, China. The tissue samples were snap frozen in liquid nitrogen at the time of surgery, RNA was extracted, and synthesized cDNA was stored at  $-80^{\circ}\text{C}$ .

### Statistical Analysis

Statistical analysis was performed using Prism 5.0 Software (GraphPad, San Diego, CA, USA). All data are presented as the means of triplicate assays  $\pm$  SD. Student's *t* test was employed to determine the significance of differences between various groups. The differences were considered significant at  $p < 0.05$ .

### SUPPLEMENTAL INFORMATION

Supplemental Information can be found online at <https://doi.org/10.1016/j.omtn.2019.04.007>.

### AUTHOR CONTRIBUTIONS

X.Z. and Y.L. conceived and designed the study. C.X., L.R., and J.Z. detected the cells' biological function, conducted the RT-PCR assays, carried out the western blot assays and luciferase reporter assays, and performed the statistical analysis. J.W. and Y.L. provided the human bladder cancer tissues specimens. J.Z. and Y.L. drafted the manuscript. All authors read and approved the final manuscript.

### CONFLICTS OF INTEREST

The authors declare no competing interests.

### ACKNOWLEDGMENTS

We thank Dr. Wen-chang Lin from the Institute of Biomedical Sciences, Academic Sinica, Nankang, Taipei 115, Taiwan, China, for the generous gifts of the plasmid of FLAG-ETS2. This work was supported by the Ningbo Social Development Major Project (2017C510009) and the foundation from the Health and Family Planning Commission of Zhejiang province (2018KY747).

### REFERENCES

- Siegel, R.L., Miller, K.D., and Jemal, A. (2016). Cancer statistics, 2016. *CA Cancer J. Clin.* 66, 7–30.
- Chen, W., Zheng, R., Baade, P.D., Zhang, S., Zeng, H., Bray, F., Jemal, A., Yu, X.Q., and He, J. (2016). Cancer statistics in China, 2015. *CA Cancer J. Clin.* 66, 115–132.
- Witjes, J.A., Compérat, E., Cowan, N.C., De Santis, M., Gakis, G., Le Bret, T., Ribal, M.J., Van der Heijden, A.G., and Sherif, A.; European Association of Urology (2014). EAU guidelines on muscle-invasive and metastatic bladder cancer: summary of the 2013 guidelines. *Eur. Urol.* 65, 778–792.
- Lewis, B.P., Burge, C.B., and Bartel, D.P. (2005). Conserved seed pairing, often flanked by adenosines, indicates that thousands of human genes are microRNA targets. *Cell* 120, 15–20.
- Xu, M., Li, J., Wang, X., Meng, S., Shen, J., Wang, S., Xu, X., Xie, B., Liu, B., and Xie, L. (2018). MiR-22 suppresses epithelial-mesenchymal transition in bladder cancer by inhibiting Snail and MAPK1/Slug/vimentin feedback loop. *Cell Death Dis.* 9, 209.
- Guancial, E.A., Bellmunt, J., Yeh, S., Rosenberg, J.E., and Berman, D.M. (2014). The evolving understanding of microRNA in bladder cancer. *Urol. Oncol.* 32, 41.e31–40.
- Hsu, S.D., Chu, C.H., Tsou, A.P., Chen, S.J., Chen, H.C., Hsu, P.W., Wong, Y.H., Chen, Y.H., Chen, G.H., and Huang, H.D. (2008). miRNAMap 2.0: genomic maps of microRNAs in metazoan genomes. *Nucleic Acids Res.* 36, D165–D169.
- Hurst, D.R., Edmonds, M.D., Scott, G.K., Benz, C.C., Vaidya, K.S., and Welch, D.R. (2009). Breast cancer metastasis suppressor 1 up-regulates miR-146, which suppresses breast cancer metastasis. *Cancer Res.* 69, 1279–1283.
- Zhu, Y., Wu, G., Yan, W., Zhan, H., and Sun, P. (2017). miR-146b-5p regulates cell growth, invasion, and metabolism by targeting PDHB in colorectal cancer. *Am. J. Cancer Res.* 7, 1136–1150.
- Gao, S., Zhao, Z., Wu, R., Wu, L., Tian, X., and Zhang, Z. (2018). MiR-146b inhibits autophagy in prostate cancer by targeting the PTEN/Akt/mTOR signaling pathway. *Aging (Albany N.Y.)* 10, 2113–2121.
- White, E.J., Brewer, G., and Wilson, G.M. (2013). Post-transcriptional control of gene expression by AUF1: mechanisms, physiological targets, and regulation. *Biochim. Biophys. Acta* 1829, 680–688.
- Al-Khalaf, H.H., and Aboussekhra, A. (2014). MicroRNA-141 and microRNA-146b-5p inhibit the prometastatic mesenchymal characteristics through the RNA-binding protein AUF1 targeting the transcription factor ZEB1 and the protein kinase AKT. *J. Biol. Chem.* 289, 31433–31447.
- Lal, A., Mazan-Mamczarz, K., Kawai, T., Yang, X., Martindale, J.L., and Gorospe, M. (2004). Concurrent versus individual binding of HuR and AUF1 to common labile target mRNAs. *EMBO J.* 23, 3092–3102.
- Zucconi, B.E., and Wilson, G.M. (2011). Modulation of neoplastic gene regulatory pathways by the RNA-binding factor AUF1. *Front. Biosci.* 16, 2307–2325.
- Abdelmohsen, K., Tominaga-Yamanaka, K., Srikantan, S., Yoon, J.H., Kang, M.J., and Gorospe, M. (2012). RNA-binding protein AUF1 represses Dicer expression. *Nucleic Acids Res.* 40, 11531–11544.
- Mook, O.R., Frederiks, W.M., and Van Noorden, C.J. (2004). The role of gelatinases in colorectal cancer progression and metastasis. *Biochim. Biophys. Acta* 1705, 69–89.
- Jin, H., Yu, Y., Hu, Y., Lu, C., Li, J., Gu, J., Zhang, L., Huang, H., Zhang, D., Wu, X.R., et al. (2015). Divergent behaviors and underlying mechanisms of cell migration and invasion in non-metastatic T24 and its metastatic derivative T24T bladder cancer cell lines. *Oncotarget* 6, 522–536.
- Jiang, G., Wu, A.D., Huang, C., Gu, J., Zhang, L., Huang, H., Liao, X., Li, J., Zhang, D., Zeng, X., et al. (2016). Isorhapontigenin (ISO) Inhibits Invasive Bladder Cancer Formation In Vivo and Human Bladder Cancer Invasion In Vitro by Targeting STAT1/FOXO1 Axis. *Cancer Prev. Res. (Phila.)* 9, 567–580.
- Gratacós, F.M., and Brewer, G. (2010). The role of AUF1 in regulated mRNA decay. *Wiley Interdiscip. Rev. RNA* 1, 457–473.
- Brennan, C.M., and Steitz, J.A. (2001). HuR and mRNA stability. *Cell. Mol. Life Sci.* 58, 266–277.
- Abdelmohsen, K., and Gorospe, M. (2012). RNA-binding protein nucleolin in disease. *RNA Biol.* 9, 799–808.
- Hu, T., Chong, Y., Lu, S., Wang, R., Qin, H., Silva, J., Kitamura, E., Chang, C.S., Hawthorn, L., and Cowell, J.K. (2018). miR-339 Promotes Development of Stem Cell Leukemia/Lymphoma Syndrome via Downregulation of the *BCL2L11* and *BAX* Proapoptotic Genes. *Cancer Res.* 78, 3522–3531.
- Lewis, B.P., Shih, I.H., Jones-Rhoades, M.W., Bartel, D.P., and Burge, C.B. (2003). Prediction of mammalian microRNA targets. *Cell* 115, 787–798.
- Chou, R., Selph, S.S., Buckley, D.L., Gustafson, K.S., Griffin, J.C., Grusing, S.E., and Gore, J.L. (2016). Treatment of muscle-invasive bladder cancer: A systematic review. *Cancer* 122, 842–851.

25. Chi, Y., and Zhou, D. (2016). MicroRNAs in colorectal carcinoma—from pathogenesis to therapy. *J. Exp. Clin. Cancer Res.* 35, 43.
26. Yoon, S.O., Kim, E.K., Lee, M., Jung, W.Y., Lee, H., Kang, Y., Jang, Y.J., Hong, S.W., Choi, S.H., and Yang, W.I. (2016). NOVA1 inhibition by miR-146b-5p in the remnant tissue microenvironment defines occult residual disease after gastric cancer removal. *Oncotarget* 7, 2475–2495.
27. Deng, X., Wu, B., Xiao, K., Kang, J., Xie, J., Zhang, X., and Fan, Y. (2015). MiR-146b-5p promotes metastasis and induces epithelial-mesenchymal transition in thyroid cancer by targeting ZNRf3. *Cell. Physiol. Biochem.* 35, 71–82.
28. Xu, E., Zhao, J., Ma, J., Wang, C., Zhang, C., Jiang, H., Cheng, J., Gao, R., and Zhou, X. (2016). miR-146b-5p promotes invasion and metastasis contributing to chemoresistance in osteosarcoma by targeting zinc and ring finger 3. *Oncol. Rep.* 35, 275–283.
29. Liu, J., Xu, J., Li, H., Sun, C., Yu, L., Li, Y., Shi, C., Zhou, X., Bian, X., Ping, Y., et al. (2015). miR-146b-5p functions as a tumor suppressor by targeting TRAF6 and predicts the prognosis of human gliomas. *Oncotarget* 6, 29129–29142.
30. Geraldo, M.V., Fuziwar, C.S., Friguglietti, C.U., Costa, R.B., Kulcsar, M.A., Yamashita, A.S., and Kimura, E.T. (2012). MicroRNAs miR-146-5p and let-7f as prognostic tools for aggressive papillary thyroid carcinoma: a case report. *Arq. Bras. Endocrinol. Metabol.* 56, 552–557.
31. Zhang, H.M., Li, Q., Zhu, X., Liu, W., Hu, H., Liu, T., Cheng, F., You, Y., Zhong, Z., Zou, P., et al. (2016). miR-146b-5p within BCR-ABL1-Positive Microvesicles Promotes Leukemic Transformation of Hematopoietic Cells. *Cancer Res.* 76, 2901–2911.
32. Xia, H., Qi, Y., Ng, S.S., Chen, X., Li, D., Chen, S., Ge, R., Jiang, S., Li, G., Chen, Y., et al. (2009). microRNA-146b inhibits glioma cell migration and invasion by targeting MMPs. *Brain Res.* 1269, 158–165.
33. Winer, A., Adams, S., and Mignatti, P. (2018). Matrix Metalloproteinase Inhibitors in Cancer Therapy: Turning Past Failures Into Future Successes. *Mol. Cancer Ther.* 17, 1147–1155.
34. Stamenkovic, I. (2000). Matrix metalloproteinases in tumor invasion and metastasis. *Semin. Cancer Biol.* 10, 415–433.
35. Tao, L., Li, Z., Lin, L., Lei, Y., Hongyuan, Y., Hongwei, J., Yang, L., and Chuize, K. (2015). MMP1, 2, 3, 7, and 9 gene polymorphisms and urinary cancer risk: a meta-analysis. *Genet. Test. Mol. Biomarkers* 19, 548–555.
36. Peng, M., Wang, J., Zhang, D., Jin, H., Li, J., Wu, X.R., and Huang, C. (2018). PHLPP2 stabilization by p27 mediates its inhibition of bladder cancer invasion by promoting autophagic degradation of MMP2 protein. *Oncogene* 37, 5735–5748.
37. Oikawa, T., and Yamada, T. (2003). Molecular biology of the Ets family of transcription factors. *Gene* 303, 11–34.
38. Yordy, J.S., and Muise-Helmericks, R.C. (2000). Signal transduction and the Ets family of transcription factors. *Oncogene* 19, 6503–6513.
39. Fry, E.A., and Inoue, K. (2018). Aberrant expression of ETS1 and ETS2 proteins in cancer. *Cancer Rep. Rev.* Published online April 23, 2018. <https://doi.org/10.15761/CRR.1000151>.
40. Singh, S., Barrett, J., Sakata, K., Tozer, R.G., and Singh, G. (2002). ETS proteins and MMPs: partners in invasion and metastasis. *Curr. Drug Targets* 3, 359–367.
41. Trojanowska, M. (2000). Ets factors and regulation of the extracellular matrix. *Oncogene* 19, 6464–6471.
42. Zhu, J., Li, Y., Tian, Z., Hua, X., Gu, J., Li, J., Liu, C., Jin, H., Wang, Y., Jiang, G., et al. (2017). ATG7 Overexpression Is Crucial for Tumorigenic Growth of Bladder Cancer In Vitro and In Vivo by Targeting the ETS2/miRNA196b/FOXO1/p27 Axis. *Mol. Ther. Nucleic Acids* 7, 299–313.
43. Raineri, I., Wegmueller, D., Gross, B., Certa, U., and Moroni, C. (2004). Roles of AUF1 isoforms, HuR and BRF1 in ARE-dependent mRNA turnover studied by RNA interference. *Nucleic Acids Res.* 32, 1279–1288.
44. Lapucci, A., Donnini, M., Papucci, L., Witort, E., Tempestini, A., Bevilacqua, A., Nicolini, A., Brewer, G., Schiavone, N., and Capaccioli, S. (2002). AUF1 Is a bcl-2 A + U-rich element-binding protein involved in bcl-2 mRNA destabilization during apoptosis. *J. Biol. Chem.* 277, 16139–16146.
45. Lin, S., Wang, W., Wilson, G.M., Yang, X., Brewer, G., Holbrook, N.J., and Gorospe, M. (2000). Down-regulation of cyclin D1 expression by prostaglandin A(2) is mediated by enhanced cyclin D1 mRNA turnover. *Mol. Cell. Biol.* 20, 7903–7913.
46. Marx, J. (2004). Cancer research. Inflammation and cancer: the link grows stronger. *Science* 306, 966–968.
47. Zhu, J., Tian, Z., Li, Y., Hua, X., Zhang, D., Li, J., Jin, H., Xu, J., Chen, W., Niu, B., et al. (2019). ATG7 Promotes Bladder Cancer Invasion via Autophagy-Mediated Increased ARHGDIβ mRNA Stability. *Adv. Sci.* 6, 1801927.
48. Hicks, R.M. (1983). Effect of promoters on incidence of bladder cancer in experimental animal models. *Environ. Health Perspect.* 50, 37–49.
49. Liao, Y.L., Hu, L.Y., Tsai, K.W., Wu, C.W., Chan, W.C., Li, S.C., Lai, C.H., Ho, M.R., Fang, W.L., Huang, K.H., and Lin, W.C. (2012). Transcriptional regulation of miR-196b by ETS2 in gastric cancer cells. *Carcinogenesis* 33, 760–769.
50. Zhu, J., Li, Y., Chen, C., Ma, J., Sun, W., Tian, Z., Li, J., Xu, J., Liu, C.S., Zhang, D., et al. (2017). NF-κB p65 Overexpression Promotes Bladder Cancer Cell Migration via FBW7-Mediated Degradation of RhoGDIα Protein. *Neoplasia* 19, 672–683.
51. Zhu, J., Zhang, J., Huang, H., Li, J., Yu, Y., Jin, H., Li, Y., Deng, X., Gao, J., Zhao, Q., and Huang, C. (2014). Crucial role of c-Jun phosphorylation at Ser63/73 mediated by PHLPP protein degradation in the chemoprevention of cell transformation. *Cancer Prev. Res. (Phila.)* 7, 1270–1281.
52. Zhu, J., Huang, G., Hua, X., Li, Y., Yan, H., Che, X., Tian, Z., Liufu, H., Huang, C., Li, J., et al. (2019). CD44s is a crucial ATG7 downstream regulator for stem-like property, invasion, and lung metastasis of human bladder cancer (BC) cells. *Oncogene*. Published online January 11, 2019. <https://doi.org/10.1038/s41388-018-0664-7>.
53. Zhu, J., Li, Y., Luo, Y., Xu, J., Liufu, H., Tian, Z., Huang, C., Li, J., and Huang, C. (2019). A Feedback Loop Formed by ATG7/Autophagy, FOXO3a/miR-145 and PD-L1 Regulates Stem-Like Properties and Invasion in Human Bladder Cancer. *Cancers (Basel)* 11, E349.
54. Huang, H., Zhu, J., Li, Y., Zhang, L., Gu, J., Xie, Q., Jin, H., Che, X., Li, J., Huang, C., et al. (2016). Upregulation of SQSTM1/p62 contributes to nickel-induced malignant transformation of human bronchial epithelial cells. *Autophagy* 12, 1687–1703.



OMTN, Volume 16

## Supplemental Information

### **MicroRNA-146b Overexpression Promotes Human Bladder Cancer Invasion via Enhancing ETS2-Mediated *mmp2* mRNA Transcription**

**Junlan Zhu, Chunxia Xu, Liming Ruan, Jianping Wu, Yang Li, and Xingguo Zhang**

Supplementary Table 1: Correlation between miR-146b expression level and clinicopathologic characteristics of BC

| parameters         | Number of cases | miR-146b expression level |      | <i>p</i> value   |
|--------------------|-----------------|---------------------------|------|------------------|
|                    |                 | Low                       | High |                  |
| Gender             |                 |                           |      |                  |
| Male               | 19              | 4                         | 15   | <i>p</i> >0.05   |
| Female             | 11              | 2                         | 9    |                  |
| Age(y)             |                 |                           |      |                  |
| <55                | 9               | 3                         | 6    | <i>p</i> >0.05   |
| >55                | 21              | 3                         | 18   |                  |
| TNM stage          |                 |                           |      |                  |
| I, II              | 15              | 4                         | 11   | * <i>p</i> <0.05 |
| III, IV            | 15              | 2                         | 13   |                  |
| Lymphatic invasion |                 |                           |      |                  |
| Negative           | 16              | 5                         | 11   | * <i>p</i> <0.05 |
| Positive           | 14              | 1                         | 13   |                  |
| Distant metastasis |                 |                           |      |                  |
| Negative           | 20              | 5                         | 15   | * <i>p</i> <0.05 |
| Positive           | 10              | 1                         | 9    |                  |

\**p* < 0.05 was considered significant.
